# Supplementary material
Source: PubMed Central journal article supplement (PMC6383784)
Supplement: NIHMS1510364-supplement-1.pdf [file NIHMS1510364-supplement-1.pdf]

**Appendix**  
**Nicotine Dependence and Pre-Enlistment Suicidal Behavior Among U.S. Army Soldiers**  
**Campbell-Sills et al.**

**Appendix Table 1.** Prevalence of Lifetime Mental Disorders Among New Soldiers With and Without Lifetime Nicotine Dependence

| Mental disorder                   | Weighted prevalence (SE) |                               | Association with ND <sup>a</sup> |
|-----------------------------------|--------------------------|-------------------------------|----------------------------------|
|                                   | No ND (n=25,631), % (SE) | Lifetime ND (n=4,805), % (SE) | AOR (95% CI)                     |
| Posttraumatic stress disorder     | 10.5 (0.2)               | 23.1 (0.6)                    | <b>2.63</b> (2.41, 2.87)         |
| Major depressive episode          | 5.6 (0.2)                | 14.3 (0.6)                    | <b>2.85</b> (2.54, 3.20)         |
| Generalized anxiety disorder      | 6.1 (0.2)                | 16.6 (0.6)                    | <b>3.06</b> (2.74, 3.41)         |
| Panic disorder                    | 2.1 (0.1)                | 6.5 (0.4)                     | <b>3.31</b> (2.81, 3.89)         |
| Alcohol or substance use disorder | 9.8 (0.2)                | 35.1 (0.7)                    | <b>5.01</b> (4.61, 5.44)         |
| Suicidal ideation                 | 11.9 (0.3)               | 21.4 (0.7)                    | <b>2.01</b> (1.83, 2.20)         |
| Mania/hypomania                   | 2.9 (0.1)                | 8.9 (0.4)                     | <b>3.25</b> (2.80, 3.77)         |
| Intermittent explosive disorder   | 11.3 (0.2)               | 24.8 (0.7)                    | <b>2.51</b> (2.30, 2.74)         |
| Conduct disorder                  | 4.5 (0.2)                | 13.3 (0.7)                    | <b>3.54</b> (3.09, 4.06)         |

*Note:* Boldface indicates statistical significance ( $p < 0.001$ ).

<sup>a</sup>Weights-adjusted logistic regression models were fit to estimate associations of lifetime ND with each lifetime mental disorder, adjusting for sociodemographic variables. AORs were generated with 95% CIs, comparing soldiers with lifetime ND to the reference group without lifetime ND.

ND, nicotine dependence.

**Appendix**  
**Nicotine Dependence and Pre-Enlistment Suicidal Behavior Among U.S. Army Soldiers**  
**Campbell-Sills et al.**

**Appendix Table 2.** Suicidal Ideation and Nicotine Dependence by Age of Onset

| Age, years      | Ideation |       | ND     |       |
|-----------------|----------|-------|--------|-------|
|                 | No       | Yes   | No     | Yes   |
| 12 <sup>a</sup> | 29,682   | 754   | 30,124 | 312   |
| 15 <sup>a</sup> | 28,104   | 1,578 | 28,625 | 772   |
| 17 <sup>a</sup> | 27,034   | 1,070 | 25,858 | 1,294 |
| 18              | 26,714   | 317   | 24,130 | 829   |
| 19              | 20,642   | 142   | 18,263 | 348   |
| 20              | 14,992   | 66    | 13,094 | 242   |
| 21              | 10,987   | 42    | 9,586  | 134   |
| 22              | 8,310    | 25    | 7,235  | 97    |
| 23              | 6,286    | 23    | 5,486  | 52    |
| 24              | 4,747    | 14    | 4,136  | 42    |
| 25              | 3,535    | 9     | 3,053  | 38    |
| 26              | 2,655    | 6     | 2,288  | 21    |
| 27              | 2,016    | 3     | 1,736  | 12    |
| 28              | 1,539    | 1     | 1,325  | 9     |
| 29              | 1,158    | 4     | 1,003  | 5     |
| 30              | 813      | 4     | 705    | 1     |
| 31              | 590      | 0     | 512    | 1     |
| 32              | 422      | 1     | 367    | 3     |
| 33              | 271      | 1     | 239    | 0     |
| 34              | 149      | 0     | 127    | 1     |

*Notes:* In the table, suicidal ideation was censored at the onset year, or at the age of interview if suicidal ideation never occurred. For ND, data were censored at the onset year or the year that ideation was censored, whichever came first (i.e., ND with incidence after onset of suicidal ideation is not counted in the table).

<sup>a</sup>Survey response options for age-of-onset questions included <13, 13–15, and 16–17 years. These were coded as 12, 15, and 17, respectively, in the person–year dataset.

ND, nicotine dependence.

**Appendix**  
**Nicotine Dependence and Pre-Enlistment Suicidal Behavior Among U.S. Army Soldiers**  
**Campbell-Sills et al.**

**Appendix Table 3.** Suicide Plan and Nicotine Dependence by Age of Onset

| Age, years      | Plan   |     | ND     |       |
|-----------------|--------|-----|--------|-------|
|                 | No     | Yes | No     | Yes   |
| 12 <sup>a</sup> | 30,305 | 131 | 30,124 | 312   |
| 15 <sup>a</sup> | 30,058 | 247 | 29,186 | 811   |
| 17 <sup>a</sup> | 29,896 | 162 | 27,513 | 1,457 |
| 18              | 29,836 | 57  | 26,436 | 952   |
| 19              | 22,926 | 24  | 19,947 | 402   |
| 20              | 16,558 | 6   | 14,244 | 276   |
| 21              | 12,095 | 6   | 10,405 | 162   |
| 22              | 9,117  | 5   | 7,852  | 102   |
| 23              | 6,907  | 2   | 5,953  | 59    |
| 24              | 5,203  | 4   | 4,483  | 47    |
| 25              | 3,872  | 2   | 3,312  | 39    |
| 26              | 2,911  | 1   | 2,482  | 22    |
| 27              | 2,213  | 1   | 1,884  | 15    |
| 28              | 1,677  | 1   | 1,426  | 11    |
| 29              | 1,270  | 1   | 1,079  | 6     |
| 30              | 892    | 1   | 757    | 3     |
| 31              | 644    | 0   | 548    | 1     |
| 32              | 454    | 0   | 386    | 3     |
| 33              | 293    | 0   | 253    | 0     |
| 34              | 163    | 0   | 137    | 1     |

*Notes:* In the table, suicide plan was censored at the onset year, or at the age of interview if a suicide plan never occurred. For ND, data were censored at the onset year or the year that suicide plan was censored, whichever came first (i.e., ND with incidence after onset of suicide plan is not counted in the table).

<sup>a</sup>Survey response options for age-of-onset questions included <13, 13–15, and 16–17 years. These were coded as 12, 15, and 17, respectively, in the person–year dataset.

ND, nicotine dependence.

**Appendix**  
**Nicotine Dependence and Pre-Enlistment Suicidal Behavior Among U.S. Army Soldiers**  
**Campbell-Sills et al.**

**Appendix Table 4.** Suicide Attempt and Nicotine Dependence by Age of Onset

| Age, years      | Attempt |     | ND     |       |
|-----------------|---------|-----|--------|-------|
|                 | No      | Yes | No     | Yes   |
| 12 <sup>a</sup> | 30,348  | 88  | 30,124 | 312   |
| 15 <sup>a</sup> | 30,161  | 187 | 29,226 | 818   |
| 17 <sup>a</sup> | 30,016  | 145 | 27,594 | 1,468 |
| 18              | 29,961  | 52  | 26,524 | 962   |
| 19              | 23,000  | 23  | 20,008 | 402   |
| 20              | 16,599  | 12  | 14,275 | 277   |
| 21              | 12,131  | 2   | 10,424 | 161   |
| 22              | 9,145   | 2   | 7,865  | 104   |
| 23              | 6,928   | 4   | 5,966  | 58    |
| 24              | 5,228   | 1   | 4,498  | 47    |
| 25              | 3,892   | 2   | 3,323  | 41    |
| 26              | 2,926   | 3   | 2,492  | 22    |
| 27              | 2,226   | 0   | 1,892  | 15    |
| 28              | 1,689   | 0   | 1,434  | 11    |
| 29              | 1,278   | 1   | 1,087  | 6     |
| 30              | 896     | 1   | 760    | 3     |
| 31              | 648     | 0   | 551    | 1     |
| 32              | 456     | 0   | 387    | 3     |
| 33              | 294     | 0   | 253    | 0     |
| 34              | 164     | 0   | 137    | 1     |

*Notes:* In the table, suicide attempt was censored at the onset year, or at the age of interview if a suicide attempt never occurred. For ND, data were censored at the onset year or the year that suicide attempt was censored, whichever came first (i.e., ND with incidence after onset of suicide attempt is not counted in the table).

<sup>a</sup>Survey response options for age-of-onset questions included <13, 13–15, and 16–17 years. These were coded as 12, 15, and 17, respectively, in the person–year dataset.

ND, nicotine dependence.
